# Supplementary material
Source: Springer Nature journal article supplement (https://www.springermedizin.de/resource/supplementary/12913_2012_2393_MOESM1_ESM.pdf/9530556)

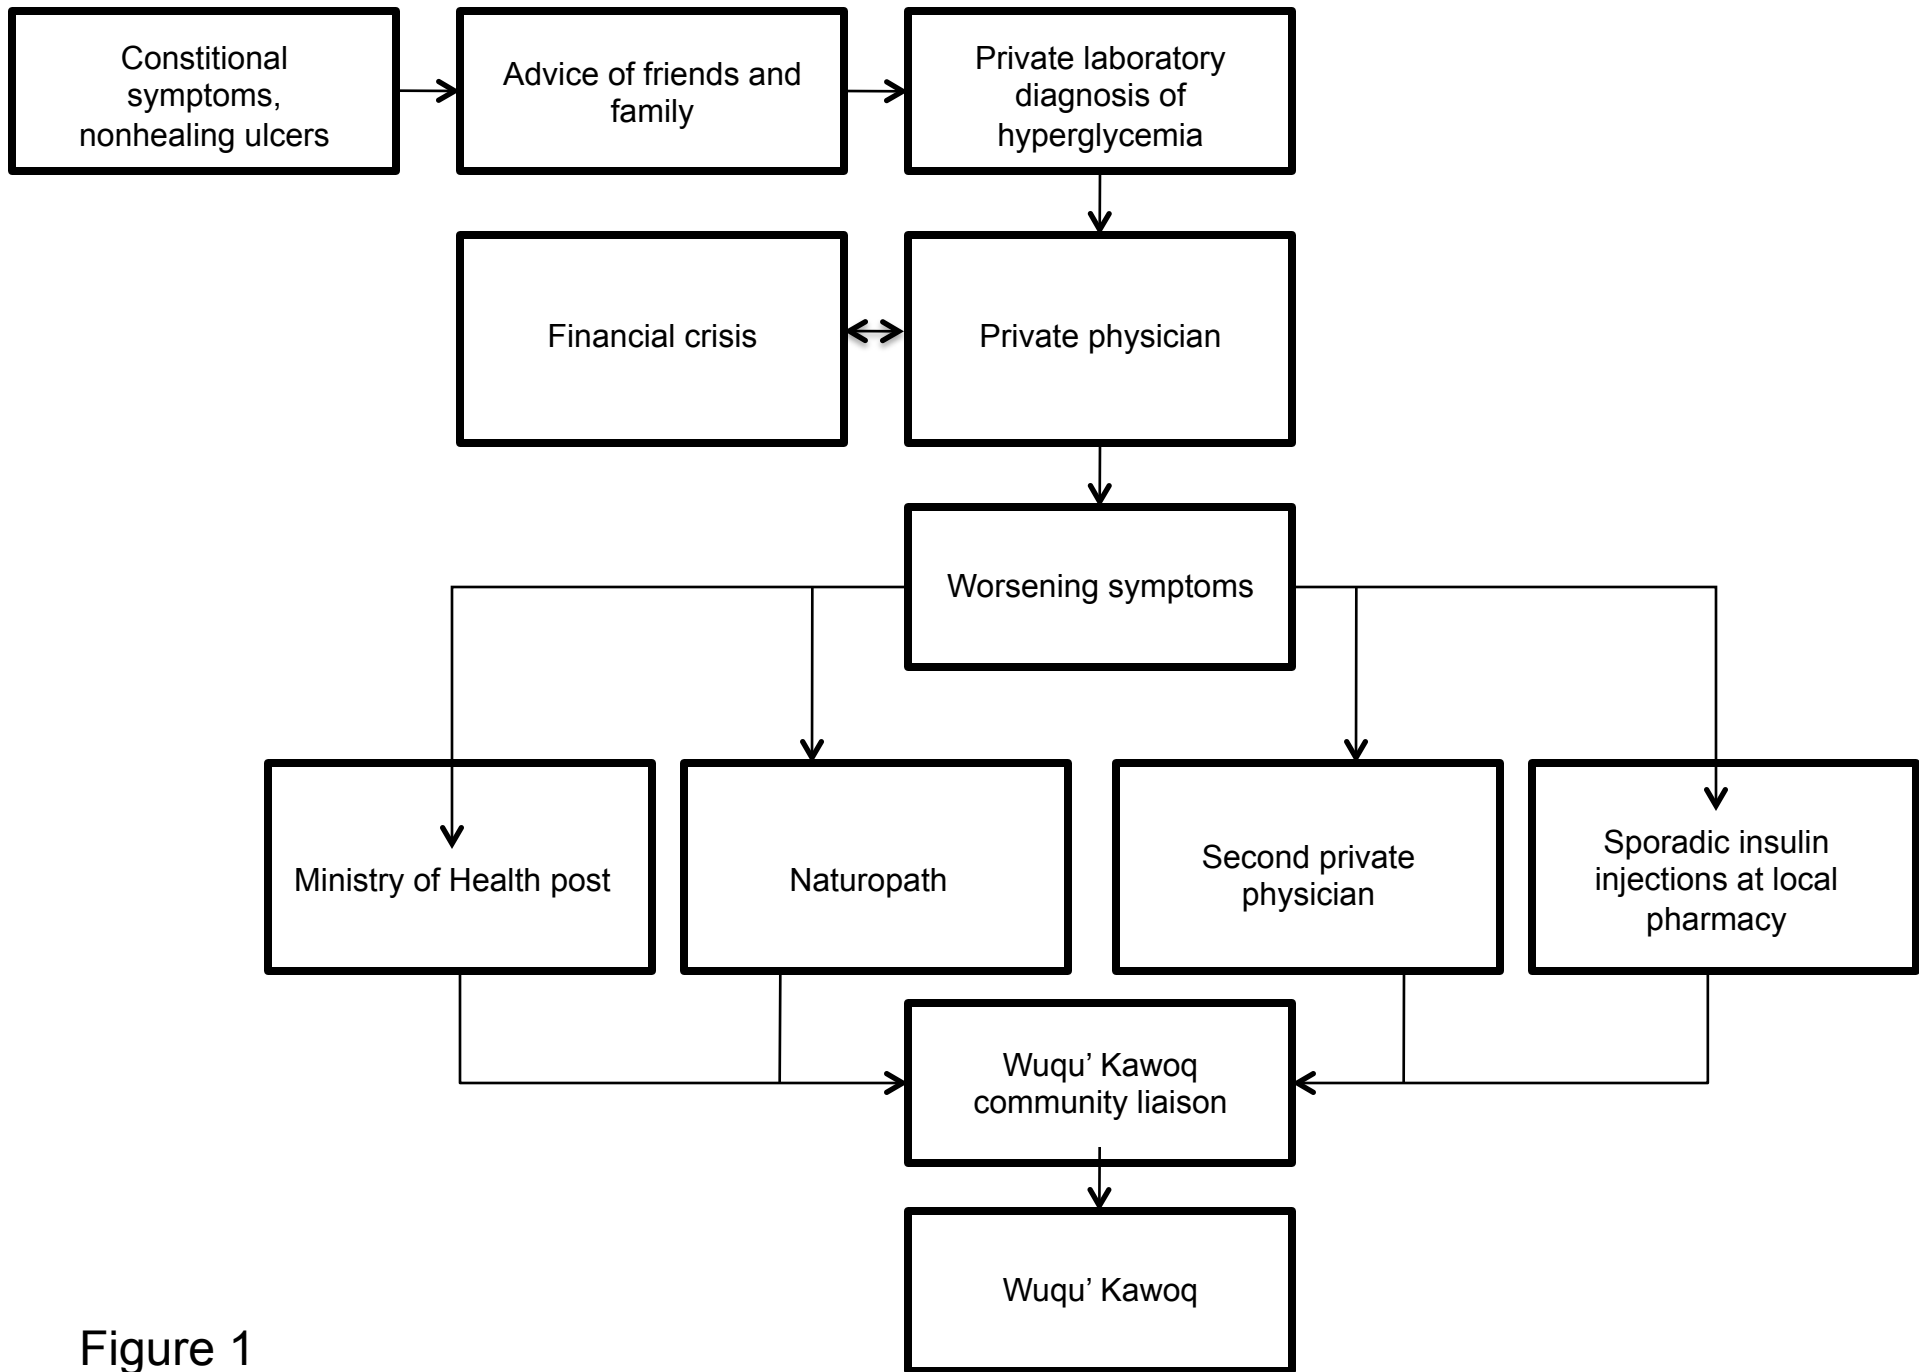

Figure 1

Supplement: MOESM1 [file 9530556]
